# Supplementary material for: Enhanced energy harvesting by concentration gradient-driven ion transport in SBA-15 mesoporous silica thin films
Source: Royal Society of Chemistry journal article supplement (doi:10.1039/c6lc00844e), 2016-01-01
Supplement: c6lc00844e1.pdf [file c6lc00844e1.pdf]

Electronic supplementary information (ESI)

# Enhanced Energy Harvesting by Concentration Gradient-Driven Ion Transport in SBA-15 Mesoporous Silica Thin Films

*Junho Hwang<sup>\*a,b</sup>, Sho Kataoka<sup>b,c</sup>, Akira Endo<sup>b,c</sup> and Hirofumi Daiguji<sup>a,b</sup>*

<sup>a</sup>Department of Mechanical Engineering, Graduate School of Engineering, The University of Tokyo, 7-3-1 Hongo, Bunkyo-ku, Tokyo 113-8656, Japan

<sup>b</sup>CREST, Japan Science and Technology Agency (JST), 7 Gobancho, Chiyoda-ku, Tokyo 102-0076, Japan

<sup>c</sup>National Institute of Advanced Industrial Science and Technology (AIST), AIST Tsukuba Central 5-2, 1-1-1 Higashi, Tsukuba, Ibaraki 305-8565, Japan

## Table of Contents

|                                                                                      |    |
|--------------------------------------------------------------------------------------|----|
| S1. Fabrication of the nanofluidic device with an SBA-15 MPS thin film.....          | 2  |
| S2. Equivalent circuit model for energy harvesting characteristics.....              | 6  |
| S3. Measurement of redox potential difference.....                                   | 9  |
| S4. Activity coefficients for calculating the redox potentials.....                  | 11 |
| S5. Effect of weak ion concentration solutions on $p_{\max}$ and $\eta_{\max}$ ..... | 14 |

### *S1. Fabrication of the nanofluidic device with an SBA-15 MPS thin film*

The nanofluidic device was fabricated by bonding the microstructured-PDMS chip embossed by the soft lithography (Replica micromolding) to the Si chip on which a patterned MPS thin film was covered with a SiO<sub>2</sub> layer resulting in two reservoirs formed on both sides of the patterned MPS thin film. Fig. S1 shows a schematic illustration of the fabrication procedure for the nanofluidic device which has a built-in MPS thin film with uniaxially aligned nanopores.

Firstly, the as-prepared MPS thin film on the Si substrate (Stage 1) was covered with a positive photoresist (OFPR-800 30cP, Tokyo Ohka Kogyo Co., Ltd., Japan) layer of  $\sim 6.5 \mu\text{m}$  using a spin-coating method, then exposed by maskless arbitrary optical micro-pattern generator to form the rectangular pattern (1 mm in length  $\times$  300  $\mu\text{m}$  in width), and developed in an aqueous alkali solution (NMD-3, Tokyo Ohka Kogyo Co., Ltd., Japan) for 90 s to obtain an upper layer pattern (Stage 2). In the following plasma chemical vapor deposition process (Stage 5), some deposits may be created inside the nanopores. To truncate the edge of the nanopore array, the width of the rectangular pattern here is larger than that of the final rectangular patterned MPS (1 mm in length  $\times$  100  $\mu\text{m}$  in width). The resulting upper photoresist layer pattern was hard baked at 383 K for 300 s to produce a robust masking layer. Then, the rectangular mask patterned MPS thin film was formed by CF<sub>4</sub>/O<sub>2</sub> plasma reactive ion etching, RIE, (SAMCO RIE-200L, Japan) at 80 W and 5 Pa for 60 s (Stage 3). Afterwards, the remaining photoresist layer was stripped off using an acetone remover (Wako Pure Chemistry Industries, Ltd., Japan) (Stage 4), then it was rinsed with DI water in the ultrasonic bath for 3 min, and the sample was hard baked at 383 K for 300 s again.

Secondly, a SiO<sub>2</sub> layer of  $\sim 100 \text{ nm}$  in thickness was deposited onto the entire area including the patterned MPS thin film via plasma chemical vapor deposition, PCVD, (SAMCO PCVD PD-20SS, Japan) (Stage 5). Subsequently, the aforementioned mask pattern process on the substrate with the deposited SiO<sub>2</sub> thin layer was completed to make two reservoirs (1 mm in width  $\times$  3 mm in length) on

both sides of the patterned rectangular MPS thin film in the same way. The distance between reservoirs is  $100\ \mu\text{m}$  and identical with the width of the final rectangular pattern (Stage 6). The RIE process was then performed in the  $\text{CF}_4/\text{O}_2$  plasma at 80 W and 5 Pa for 120 s to etch the deposited  $\text{SiO}_2$  layer (Stage 7) and sequentially in the  $\text{SF}_6/\text{O}_2$  plasma at 80 W and 5 Pa for 480 s to etch a layer of  $\sim 1\ \mu\text{m}$  in depth on the Si substrates (Stage 8). Afterwards, the remaining photoresist layer was stripped off using the acetone remover (Stage 9), then it was rinsed with DI water in the ultrasonic bath for 3 min, and the sample was hard baked at 383 K for 300 s again.

Finally, the 1st microstructured-PDMS chip and 2nd PDMS chip for injecting aqueous solutions were bonded onto the patterned substrate with the MPS thin film by a wet-PDMS bonding method (Stage 10).

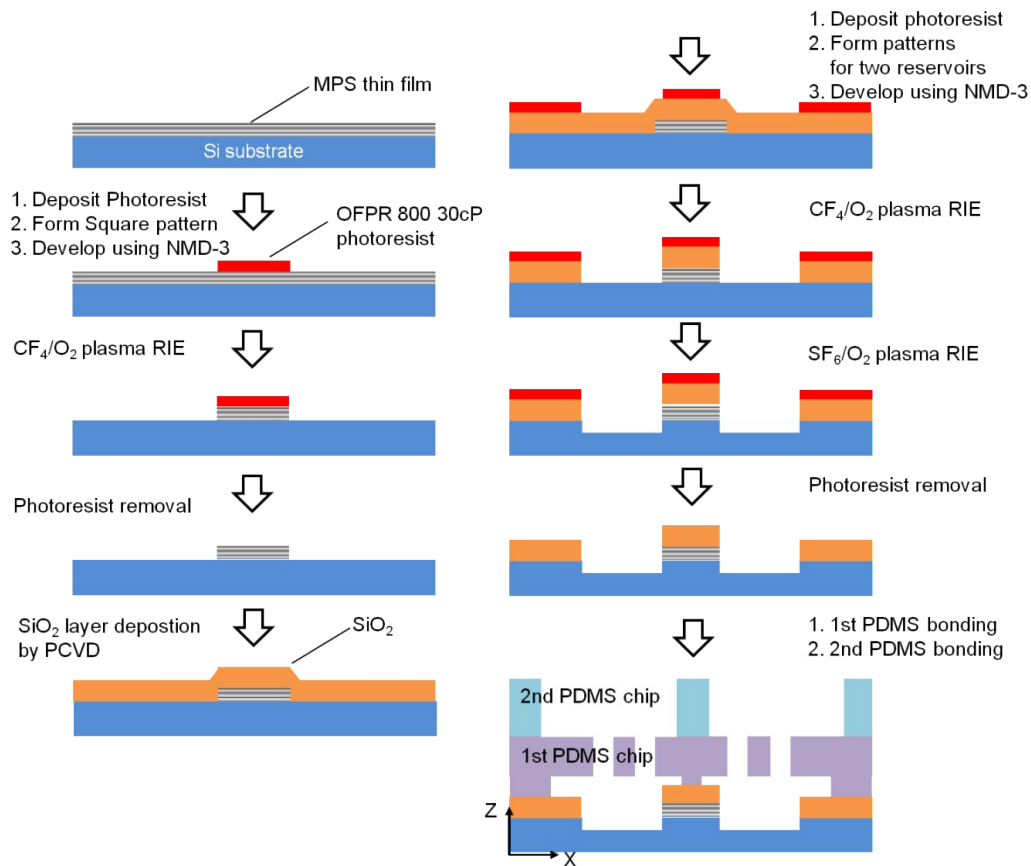

Figure S1. Schematic illustration of the fabrication procedure of the nanofluidic device with the MPS thin film of the uniaxially aligned nanopores.

Fig. S2 (a) and (b) show a top view and a cross-sectional view of PDMS chips produced by the soft lithography (replica micro-molding method), respectively. There are four holes (1 mm in diameter) for effectively injecting aqueous solutions. Two inlet holes were formed on each reservoir using a 1 mm-diameter disposable biopsy punch with a plunger system (Kai Industries Co. Ltd., Japan). The size of each reservoir is 3 mm in length, 1 mm in width, and 100  $\mu\text{m}$  in height. The distance between the two reservoirs is 50  $\mu\text{m}$ . The second PDMS chip shown in Fig. S2 (c) and (d) has much larger reservoirs and the size is 8 mm in length, 3.5 mm in width, and 5 mm in height.

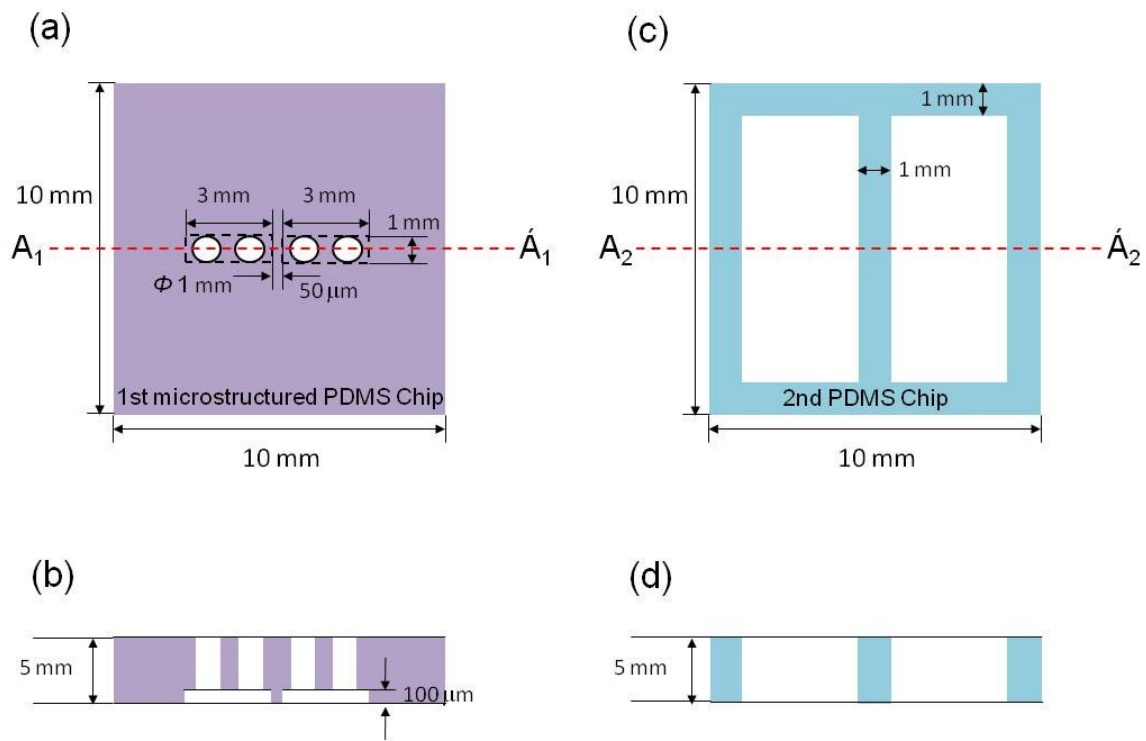

Figure S2. Schematic diagram of the PDMS chip. (a) Top view and (b) cross sectional view (at  $A_1$ - $A_1$  line) of the first microstructured PDMS chip with four drilled holes for injecting aqueous solutions, and (c) top view and (d) cross-sectional view (at  $A_2$ - $A_2$  line) of the second PDMS chip with two rectangular reservoirs.

The as-prepared PDMS chips were cleaned with isopropanol (Wako Pure Chemistry Industries, Ltd., Japan) in the ultrasonic bath for 600 s. The sample was dried using a nitrogen gun and then placed in a clean room at room temperature for 24 hours. Afterwards, a PDMS monomer/curing agent mixture (10:1 wt/wt %) was spread on a clean silicon substrate by a spin coater at 7500 rpm for 120 s, yielding a thin layer of wet PDMS (ca. 5  $\mu\text{m}$  in thickness). The bonding side of the PDMS chip was directly applied to the wet PDMS layer, and thus the bonding surface was coated with the wet PDMS. Within half an hour, the PDMS chips were carefully aligned and bonded onto the patterned substrate using a stereomicroscope (model SMZ-1000, Nikon Instruments Inc., Japan) and a micro manipulator (M-152 model, Narishige, Japan). The combined chip was then cured in a convection oven at 353 K for 1 hour to completely seal the whole device.

S2. Equivalent circuit model for energy harvesting characteristics

Fig. S3 (a) shows the equivalent circuit representing the experimental setup. The electric potential generated in nanopores,  $V$ , is given by

$$V = V_{\text{out}} - V_{\text{redox}} = V_{\text{oc}} - IR, \dots\dots\dots(S1)$$

where  $I$  is the ionic current,  $V_{\text{out}}$  is the voltage output from a source meter,  $V_{\text{redox}}$  is the potential difference between two Ag/AgCl electrodes due to the redox reactions,  $V_{\text{oc}}$  is the open-circuit voltage due to the ion-selective property, and  $R$  is internal resistance of nanopores, respectively.  $V_{\text{redox}}$  is caused by an unequal potential drop at the two electrodes and given by the Nernst equation:<sup>S1</sup>

$$V_{\text{redox}} = \frac{RT}{zF} \ln \frac{\gamma_{\text{c}_\text{H}} c_{\text{H}}}{\gamma_{\text{c}_\text{L}} c_{\text{L}}}, \dots\dots\dots(S2)$$

where  $R$ ,  $T$ ,  $z$ ,  $F$ , and  $\gamma$  are the gas constant, temperature, valence, Faraday constant, and activity coefficient, respectively. In this study,  $V_{\text{redox}}$  was measured using different combinations of  $c_{\text{H}}$  and  $c_{\text{L}}$  and the measured value was compared to the calculated one from Eq. S2. (Supporting Information S3)

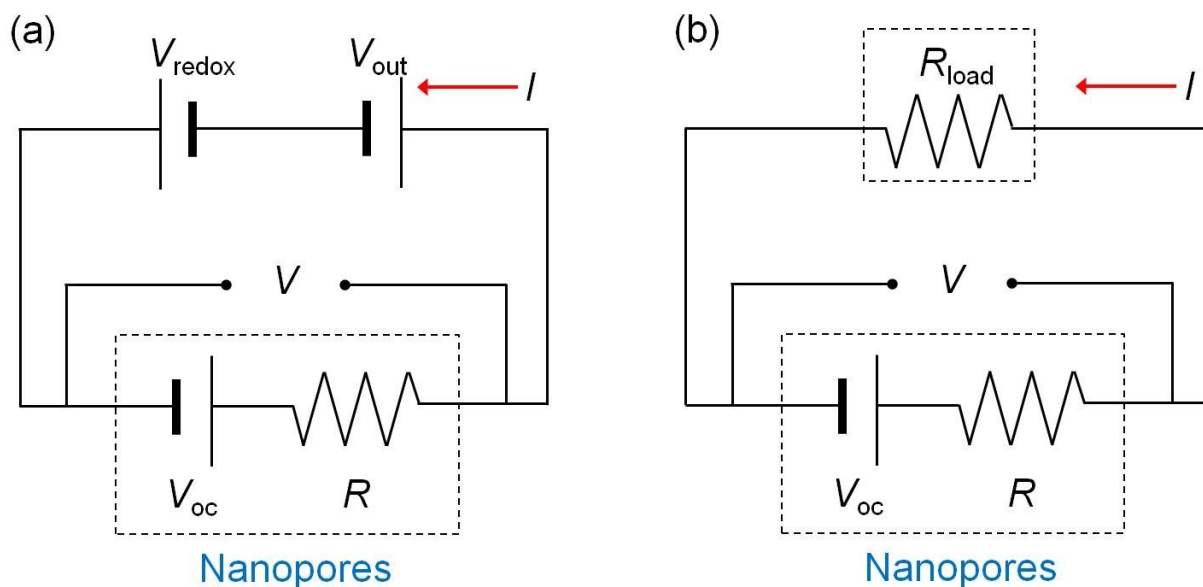

Figure S3. (a) Circuit model for the experimental setup and (b) the equivalent circuit model replacing the source meter ( $V_{\text{out}}$ ) and the electrode ( $V_{\text{redox}}$ ) with the electrical load ( $R_{\text{load}}$ ).

$V_{oc}$  satisfies the following equation:

$$V_{oc} = (2t_+ - 1) \frac{RT}{zF} \ln \frac{\gamma_{c_H} c_H}{\gamma_{c_L} c_L}, \dots\dots\dots(S3)$$

where  $t_+$  is the transference number for the cation. From Eqs. S3 and S4,  $t_+$  is given by

$$t_+ = \frac{1}{2} \left( \frac{V_{oc}}{V_{redox}} + 1 \right). \dots\dots\dots(S4)$$

The transference number represents the ratio of the cation flux to the entire ion flux, i.e.  $t_+ = J_+ / (J_+ + J_-)$ . Here,  $J_+$  and  $J_-$  are the cation and anion fluxes, respectively. Note that  $t_+ = 1$  and  $t_+ = 0$  indicate either entirely cation or anion selective nanopores, respectively, while  $t_+ \approx 0.5$  means non ion-selective nanopores if  $D_+ \approx D_-$ . If the energy harvesting system is composed of entirely cation-selective nanopores, i.e.  $t_+ = 1$ , then  $V_{oc} = V_{redox}$  and  $V_{oc}$  becomes the maximum. Furthermore, if the source meter ( $V_{out}$ ) and the electrode ( $V_{redox}$ ) are regarded as the electrical load ( $R_{load}$ ) for the energy harvesting system as shown in Fig. S3 (b),  $R_{load}$  is defined as follows:

$$R_{load} = \frac{V_{out} - V_{redox}}{I} = \frac{V}{I}. \dots\dots\dots(S5)$$

The power,  $P$ , is therefore given by

$$P = VI = V_{oc}^2 \frac{R_{load}}{(R_{load} + R)^2}. \dots\dots\dots(S6)$$

The maximum power,  $P_{max}$ , is obtained at  $R_{load} = R$ . Therefore,  $P_{max}$  is given by

$$P_{max} = \frac{V_{oc}^2}{4R}. \dots\dots\dots(S7)$$

When  $P = P_{max}$ ,  $V = V_{oc} / 2$ . The energy conversion efficiency,  $\eta$ , is defined as the ratio of the electrical output energy to the input energy, and given by<sup>S2</sup>

$$\eta = \frac{VI}{RT \ln\left(\frac{\gamma_{c_H} c_H}{\gamma_{c_L} c_L}\right) \int (J_+ + J_-) dA} \dots\dots\dots(S8)$$

From Eqs. S1 and S3, the maximum energy conversion efficiency,  $\eta_{\max}$ , is given by

$$\eta_{\max} = \frac{(2t_+ - 1)I}{2zF \int (J_+ + J_-) dA} \dots\dots\dots(S9)$$

Because the ionic current passing through nanopores is defined as  $I = zF \int (J_+ - J_-) dA$ ,  $\eta_{\max}$  can also be given by

$$\eta_{\max} = \frac{1}{2}(2t_+ - 1)^2 \dots\dots\dots(S10)$$



### S3. Measurement of redox potential difference

To calibrate the electrodes, the measured  $V_{\text{redox}}$  using an electrochemical cell system was compared to the calculated value of Eq. S2. Activity coefficients in Eq. S2 were calculated with the Pitzer model (Supporting Information S4). In the measurement of  $V_{\text{redox}}$ , qualitative filter papers (ADVANTEC No.1 type, Toyo Roshi Kaisha, Ltd., Japan) were used as the salt bridge. The filter papers are 200  $\mu\text{m}$  thick and retain coarse and gelatinous precipitates 10  $\mu\text{m}$  in size. Here, the measured electric potential between two Ag/AgCl electrodes was attributed only to the asymmetric redox reactions at the electrode-solution interface. Fig. S4 shows the measured and calculated  $V_{\text{redox}}$  as a function of  $\log(c_{\text{H}}/c_{\text{L}})$ . The measured and calculated  $V_{\text{redox}}$  were close to each other but the measured  $V_{\text{redox}}$  was slightly smaller than the calculated one. The measured and calculated  $V_{\text{redox}}$  of three kinds of electrolytes KCl, NaCl and LiCl are summarized in Table S1.

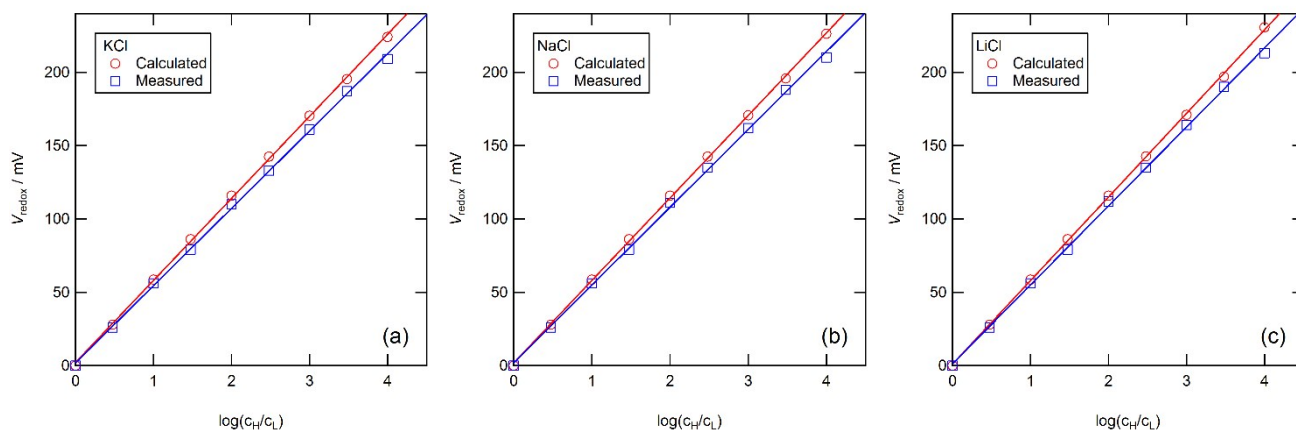

Figure S4. Measured and calculated  $V_{\text{redox}}$  as a function of  $\log(c_{\text{H}}/c_{\text{L}})$  for three kinds of electrolytes, (a) KCl, (b) NaCl, and (c) LiCl. The solid lines represent the fitting lines.

Table S1. Measured and calculated  $V_{\text{redox}}$  for the three electrolytes: KCl, NaCl, and LiCl.

(a) KCl

| $\frac{c_{\text{H}}[\text{M}]}{c_{\text{L}}[\text{M}]}$ | $\frac{3 \times 10^{-4}}{10^{-4}}$ | $\frac{10^{-3}}{10^{-4}}$ | $\frac{3 \times 10^{-3}}{10^{-4}}$ | $\frac{10^{-2}}{10^{-4}}$ | $\frac{3 \times 10^{-2}}{10^{-4}}$ | $\frac{10^{-1}}{10^{-4}}$ | $\frac{3 \times 10^{-1}}{10^{-4}}$ | $\frac{10^{-0}}{10^{-4}}$ |
|---------------------------------------------------------|------------------------------------|---------------------------|------------------------------------|---------------------------|------------------------------------|---------------------------|------------------------------------|---------------------------|
| Calculated $V_{\text{redox}}$ [mV]                      | 28                                 | 58.6                      | 86.2                               | 116                       | 142                                | 171                       | 195                                | 224                       |
| Measured $V_{\text{redox}}$ [mV]                        | 26                                 | 56                        | 79                                 | 110                       | 133                                | 161                       | 187                                | 209                       |

(b) NaCl

| $\frac{c_{\text{H}}[\text{M}]}{c_{\text{L}}[\text{M}]}$ | $\frac{3 \times 10^{-4}}{10^{-4}}$ | $\frac{10^{-3}}{10^{-4}}$ | $\frac{3 \times 10^{-3}}{10^{-4}}$ | $\frac{10^{-2}}{10^{-4}}$ | $\frac{3 \times 10^{-2}}{10^{-4}}$ | $\frac{10^{-1}}{10^{-4}}$ | $\frac{3 \times 10^{-1}}{10^{-4}}$ | $\frac{10^{-0}}{10^{-4}}$ |
|---------------------------------------------------------|------------------------------------|---------------------------|------------------------------------|---------------------------|------------------------------------|---------------------------|------------------------------------|---------------------------|
| Calculated $V_{\text{redox}}$ [mV]                      | 28                                 | 58.6                      | 86.2                               | 116                       | 142                                | 171                       | 196                                | 226                       |
| Measured $V_{\text{redox}}$ [mV]                        | 26                                 | 56                        | 79                                 | 111                       | 135                                | 162                       | 188                                | 210                       |

(c) LiCl

| $\frac{c_{\text{H}}[\text{M}]}{c_{\text{L}}[\text{M}]}$ | $\frac{3 \times 10^{-4}}{10^{-4}}$ | $\frac{10^{-3}}{10^{-4}}$ | $\frac{3 \times 10^{-3}}{10^{-4}}$ | $\frac{10^{-2}}{10^{-4}}$ | $\frac{3 \times 10^{-2}}{10^{-4}}$ | $\frac{10^{-1}}{10^{-4}}$ | $\frac{3 \times 10^{-1}}{10^{-4}}$ | $\frac{10^{-0}}{10^{-4}}$ |
|---------------------------------------------------------|------------------------------------|---------------------------|------------------------------------|---------------------------|------------------------------------|---------------------------|------------------------------------|---------------------------|
| Calculated $V_{\text{redox}}$ [mV]                      | 28                                 | 58.6                      | 86.2                               | 116                       | 143                                | 171                       | 197                                | 231                       |
| Measured $V_{\text{redox}}$ [mV]                        | 26                                 | 56                        | 79                                 | 112                       | 135                                | 164                       | 190                                | 213                       |

*S4. Activity coefficients for calculating the redox potentials*

When the concentration of aqueous solutions is less than 2 mM, the activity coefficients are approximated by the Debye-Hückel limiting law:<sup>S3</sup>

$$\log \gamma_i = -Az_i \sqrt{I} . \dots\dots\dots(S11)$$

Here,  $\gamma_i$  and  $z_i$  are the activity coefficient and valence of ion species  $i$ ,  $A$  is a constant which depends on temperature and an experimental value of water = 0.509 mol<sup>-1/2</sup> kg<sup>1/2</sup> at 298 K, and  $I$  is the ionic strength for electrolytes defined by  $I = \frac{1}{2} \sum_i c_i z_i^2$ , where  $c_i$  is the molar concentration of ion species  $i$ .

However, in this study, the concentration ranges from 0.1 mM to 1 M, thus the Debye- Hückel limiting law is not applicable and the Pitzer model is used instead to determine the activity coefficients in the high ionic strength solutions ( $\leq 1$  M). In the Pitzer model, the activity coefficients of aqueous solutions at 298 K are given by the following equations:<sup>S4-S6</sup>

$$\ln \gamma_M = z_M^2 f^\gamma + 2 \sum_X c_X G_{MX} + \sum_M \sum_X c_M c_X G'_M , \dots\dots\dots(S12)$$

$$\ln \gamma_X = z_X^2 f^\gamma + 2 \sum_M c_M G_{MX} + \sum_M \sum_X c_M c_X G'_X , \dots\dots\dots(S13)$$

where the subscript M and X refer to cations and anions, respectively, and  $f^\gamma$  is the electrostatic term.

At a fixed valence,  $f^\gamma$  is the same for all kinds of ions, and given by

$$f^\gamma = -A^\phi \left\{ \frac{\sqrt{I}}{(1 + b\sqrt{I})} + \frac{2}{b} \ln(1 + b\sqrt{I}) \right\} , \dots\dots\dots(S14)$$

where  $b$  is a constant and assumed to be 1.2 and  $A^\phi$  is the Debye-Hückel coefficient for the osmotic function, and given by

$$A^\phi = \frac{2\pi N_A \rho_w^{1/2}}{3 \times 10^3} \left( \frac{e^2}{\epsilon k_B T} \right)^{3/2} , \dots\dots\dots(S15)$$

where  $N_A$  is the Avogadro number,  $\rho_w$  and  $\varepsilon$  are the density and the dielectric constant of pure solvent,  $k_B$  is the Boltzmann constant, and  $e$  is the electric charge. The parameters  $G_{MX}$ ,  $G'_M$  and  $G'_X$  in Eqs. S11 and S12 are given by

$$G_{MX} = B_{MX} + \frac{1}{2} \left( \sum_i c_i |z_i| \right) C_{MX}, \dots\dots\dots (S16)$$

$$G'_M = z_M^2 B'_{MX} + z_M C_{MX}, \dots\dots\dots (S17)$$

$$G'_X = z_X^2 B'_{MX} + |z_X| C_{MX}, \dots\dots\dots (S18)$$

where  $C_{MX}$  is given by

$$C_{MX} = \frac{C_{MX}^\phi}{2\sqrt{|z_M z_X|}}. \dots\dots\dots (S19)$$

For 1:1 electrolyte, the parameters of  $B_{MX}$  and  $B'_{MX}$  are given by

$$B_{MX} = \beta_{MX}^{(0)} + \frac{2\beta_{MX}^{(1)}}{\alpha^2 I} \left\{ - \left( 1 + \alpha\sqrt{I} \right) \exp \left( -\alpha\sqrt{I} \right) \right\}, \dots\dots\dots (S20)$$

$$B'_{MX} = \frac{2\beta_{MX}^{(1)}}{\alpha^2 I^2} \left\{ -1 + \left( 1 + \alpha\sqrt{I} + \frac{1}{2} \alpha^2 I \right) \exp \left( -\alpha\sqrt{I} \right) \right\}, \dots\dots\dots (S21)$$

where  $\alpha$  is a constant and assumed to be 2.0. The interaction parameters of  $C_{MX}^\phi$ ,  $\beta_{MX}^{(0)}$  and  $\beta_{MX}^{(1)}$  are summarized in Table S2.

Table S2. The interaction parameters of  $C_{MX}^\phi$ ,  $\beta_{MX}^{(0)}$  and  $\beta_{MX}^{(1)}$  for KCl, NaCl and LiCl electrolytes.<sup>S6</sup>

| Electrolyte | $C_{MX}^\phi$ | $\beta_{MX}^{(0)}$ | $\beta_{MX}^{(1)}$ |
|-------------|---------------|--------------------|--------------------|
| KCl         | -0.00084      | 0.04835            | 0.2122             |
| NaCl        | 0.00127       | 0.0765             | 0.2664             |
| LiCl        | 0.1494        | 0.3074             | 0.00359            |

Fig. S5 shows the activity coefficients for three kinds of electrolytes: KCl, NaCl and LiCl calculated by the Pitzer model. The calculated values of the activity coefficients are summarized in Table S3.

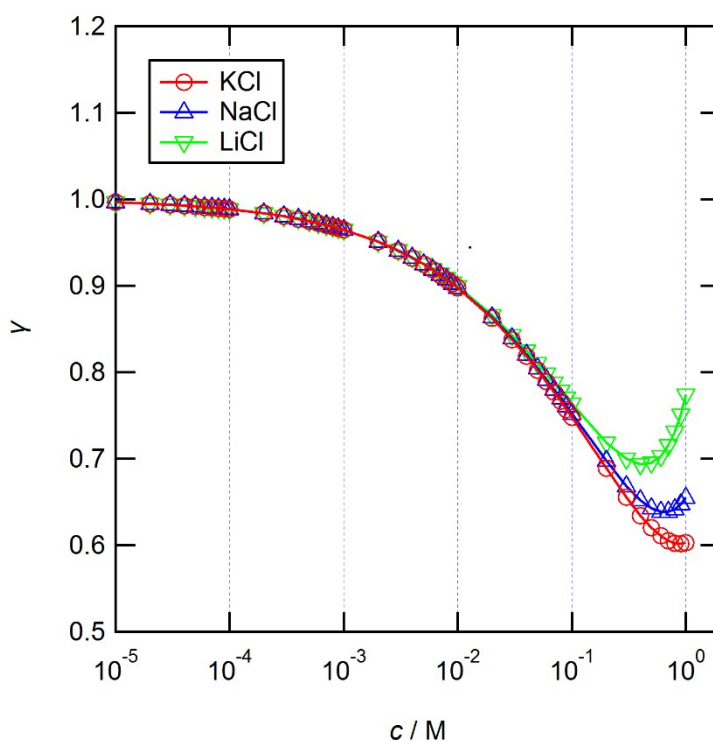

Figure S5. Activity coefficients with respect to the concentrations for the three electrolytes: KCl, NaCl, and LiCl.

Table S3. Calculated values of the activity coefficients.

| Concentration [M]  | KCl   | NaCl  | LiCl  |
|--------------------|-------|-------|-------|
| $10^{-4}$          | 0.988 | 0.988 | 0.988 |
| $3 \times 10^{-4}$ | 0.980 | 0.980 | 0.980 |
| $10^{-3}$          | 0.964 | 0.965 | 0.965 |
| $3 \times 10^{-3}$ | 0.940 | 0.941 | 0.941 |
| $10^{-2}$          | 0.897 | 0.898 | 0.899 |
| $3 \times 10^{-2}$ | 0.838 | 0.839 | 0.843 |
| $10^{-1}$          | 0.748 | 0.752 | 0.763 |
| $3 \times 10^{-1}$ | 0.656 | 0.668 | 0.700 |
| 1                  | 0.603 | 0.655 | 0.774 |

### S5. Effect of weak ion concentration solutions on $p_{\max}$ and $\eta_{\max}$

Fig. S6 shows the  $p_{\max}$  and  $\eta_{\max}$  with respect to  $\log(c_H/c_L)$  for KCl. The higher concentration ( $c_H$ ) was fixed at 100 mM and the lower concentration ( $c_L$ ) gradually increased from 0.3 to 30 mM. The lower concentration ( $c_L$ ) was the variable in this experiment. The measured and calculated  $V_{\text{redox}}$  values with respect to  $c_H/c_L$  are summarized in Table S4. In comparing Fig. S6 to Fig. 8 (c) and (d), the highest values of  $p_{\max}$  and  $\eta_{\max}$  decrease with increasing  $c_L$  from 0.1 mM, but both values of  $p_{\max}$  and  $\eta_{\max}$  retain simultaneously high levels at  $\log(c_H/c_L) = 1.5$ –2.5. The highest  $p_{\max}$  is  $2.85 \text{ W m}^{-2}$  at  $\log(c_H/c_L) = 2.5$  and the highest  $\eta_{\max}$  is 36.2% at  $\log(c_H/c_L) = 1.5$ .

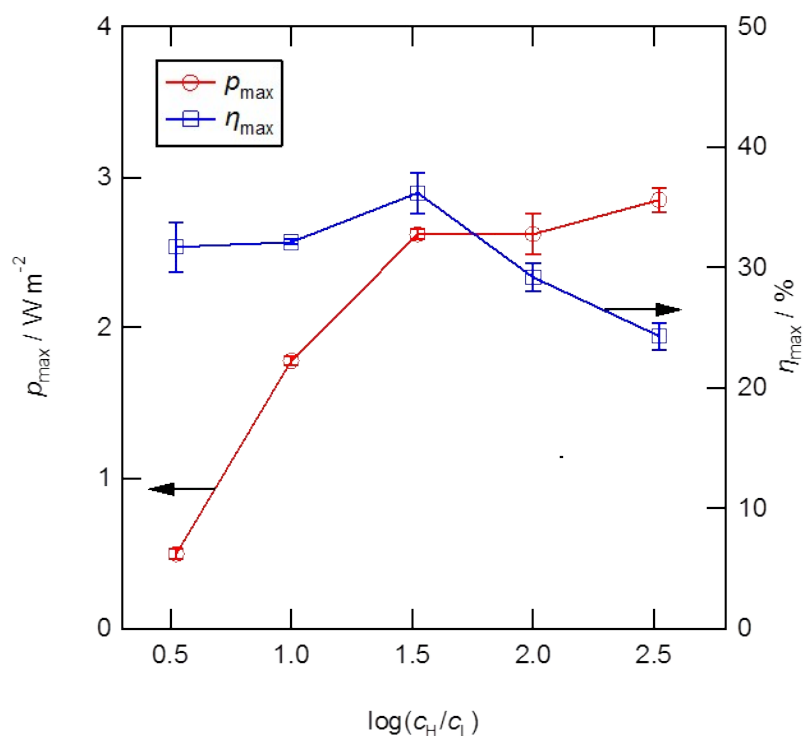

Figure S6. Power density and energy conversion efficiency with respect to different concentration gradients for KCl. The error bars represent the standard deviations.

Table S4. Measured and calculated  $V_{\text{redox}}$  of KCl.

| $\frac{c_{\text{H}}[\text{M}]}{c_{\text{L}}[\text{M}]}$ | $\frac{10^{-1}}{3 \times 10^{-4}}$ | $\frac{10^{-1}}{10^{-3}}$ | $\frac{10^{-1}}{3 \times 10^{-3}}$ | $\frac{10^{-1}}{10^{-2}}$ | $\frac{10^{-1}}{3 \times 10^{-2}}$ |
|---------------------------------------------------------|------------------------------------|---------------------------|------------------------------------|---------------------------|------------------------------------|
| Calculated $V_{\text{redox}}$ [mV]                      | 142.4                              | 111.9                     | 84.3                               | 54.5                      | 28.1                               |
| Measured $V_{\text{redox}}$ [mV]                        | 134                                | 107                       | 79                                 | 53                        | 27                                 |

#### References

S1 A. J. Bard and L. R. Faulkner, *Electrochemical Methods: Fundamentals and Applications*, John Wiley, New York, 2001

S2 J. C. Fair and J. F. Osterle, *J. Chem. Phys.*, 1971, **54**, 3307.

S3 P. Debye and E. Hückel, *Physikalische Zeitschrift*, 1923, **24**, 185.

S4 B. S. Krumgalz and F. J. Millero, *Mar. Chem.*, 1982, **11**, 209.

S5 K. S. Pitzer, *J. Phys. Chem.*, 1973, **77**, 268.

S6 K. S. Pitzer and G. Mayorga, *J. Phys. Chem.*, 1973, **77**, 2300.
